# Supplementary material
Source: PubMed Central journal article supplement (PMC9733963)
Supplement: mmc1.pdf [file mmc1.pdf]

## Supplementary Material

### Long-term outcomes of COVID-19 convalescents: An 18.5-month longitudinal study in Wuhan

#### Table of contents:

|                                                                                                                                                    |    |
|----------------------------------------------------------------------------------------------------------------------------------------------------|----|
| eText. Supplementary Methods .....                                                                                                                 | 2  |
| eFigure 1. Flow chart of the study. ....                                                                                                           | 4  |
| eTable 1. Basic characteristics of convalescents according to disease severity. ....                                                               | 5  |
| eTable 2. Physical and psychological health status of convalescents during follow-up according to disease severity. ....                           | 6  |
| eTable 3. Physical and psychological health status of convalescents in different disease severity during follow-up. ....                           | 8  |
| eTable 4. Lung function, chest CT, and 6-minute walk test variation of the COVID-19 survivors during follow-up according to disease severity. .... | 10 |
| eTable 5. Detailed inpatient information of the participants. ....                                                                                 | 12 |
| eTable 6. Physical and psychological health status of convalescents during follow-up according to the length of hospital stay. ....                | 13 |
| eTable 7. Physical and psychological health status of convalescents during follow-up according to the ICU stay record. ....                        | 15 |
| eTable 8. Basic characteristics of participants who were included and excluded. ....                                                               | 17 |
| References.....                                                                                                                                    | 17 |

## 22 **eText. Supplementary Methods**

### 23 **Study population and severity classification**

24 Convalescents in this study refer to patients who were admitted to the hospital and discharged  
25 after recovery. Detailed inpatient information of the participants was shown in Supplementary  
26 eTable 5. COVID-19 cases were diagnosed according to the 7th Trial Version of national  
27 guidelines released on March 3, 2020 (2020). Critical patients were defined as having acute  
28 respiratory distress syndrome and in the need of mechanical ventilation, and/or shock, and/or  
29 having complications of other organ failures. Severe patients were defined as respiratory rate  
30  $\geq 30$ /min, and/or oxygen saturation levels ( $SpO_2$ ) at rest  $\leq 93\%$ , and/or arterial partial pressure  
31 of oxygen ( $PaO_2$ )/fraction of inspired oxygen ( $FiO_2$ )  $\leq 300$  mmHg, and/or pulmonary lesion  
32 progression  $>50\%$  within 24 to 48 hours. Moderate patients were defined as having fever and  
33 respiratory symptoms and radiological findings of pneumonia. Mild patients were defined as  
34 having mild clinical symptoms with no sign of pneumonia on imaging. Given the limited  
35 number of mild and critical patients in this study, we defined mild participants as those who  
36 met either moderate or mild patients' standards and severe participants as those who met either  
37 critical or severe patients' standards.

### 38 **Admission and discharge criteria**

39 Patients were confirmed and admitted to the hospital if they were positive for the real-time  
40 fluorescent (RT-PCR) test of COVID-19, and/or had highly homologous viral gene sequence  
41 to COVID-19, and/or were detected serum COVID-19 specific IgM and IgG (IgG is detectable  
42 or reaches 4-fold titration increase in convalescence compared with the acute phase) (2020).  
43 The patients could be discharged only if all the following criteria were met: normal body  
44 temperature for more than 3 days; obvious improved respiratory symptoms; obvious absorption  
45 of inflammation in pulmonary imaging; twice consecutive and negative nuclei acid tests on  
46 respiratory tract samples, with sampling interval no less than 24 hours (2020). The

47 hospitalization duration was defined as the interval between discharged date and the confirmed  
48 date.

#### 49 **Statistical analysis**

50 Continuous variables were expressed as median (interquartile range) and compared by using  
51 the Mann-Whitney U test or Kruskal-Wallis test according to nonnormal distribution assessed  
52 by Shapiro-Wilk tests. Categorical variables were expressed as frequency (percentage) and  
53 compared with  $\chi^2$  test or Fisher's Exact test in group comparisons. Linear mixed model was  
54 established to calculate the fixed effects of repeated measures on log-transformed NT<sub>50</sub> for  
55 serum SARS-CoV-2 NAb, adjusted for age (continuous), gender (male or female), and  
56 vaccination (vaccinated group or unvaccinated group). Random effects included days of the  
57 NAb test after symptom onset and days of the first shot of the COVID-19 vaccine since  
58 symptom onset of each participant. Generalized linear mixed models were established to  
59 explore the associations of any sequelae symptoms (categorical) with fixed effects. Each  
60 participant was included in random effect. For the age group (<60 years/ $\geq$ 60 years), we  
61 adjusted gender (male/female) and education (middle school or lower/college or higher).  
62 Comorbidities including hypertension (no/yes), diabetes (no/yes), and CVD (no/yes), and  
63 disease severity (mild/severe) were excluded due to the potential mediating effects. For gender,  
64 we adjusted age group, education, comorbidities, and disease severity. For education, we  
65 adjusted age group, gender, and disease severity. Comorbidities were excluded due to the  
66 potential mediating effects. For comorbidities (hypertension, diabetes, and CVD), we adjusted  
67 each for age group, gender, education, and comorbidities except itself. Disease severity  
68 (mild/severe) was excluded due to the potential mediating effects. Two-sided *P* values less than  
69 0.05 were considered statistically significant. All data analyses were performed using R  
70 statistical software version 4.1.0 (The R Foundation for Statistical Computing).

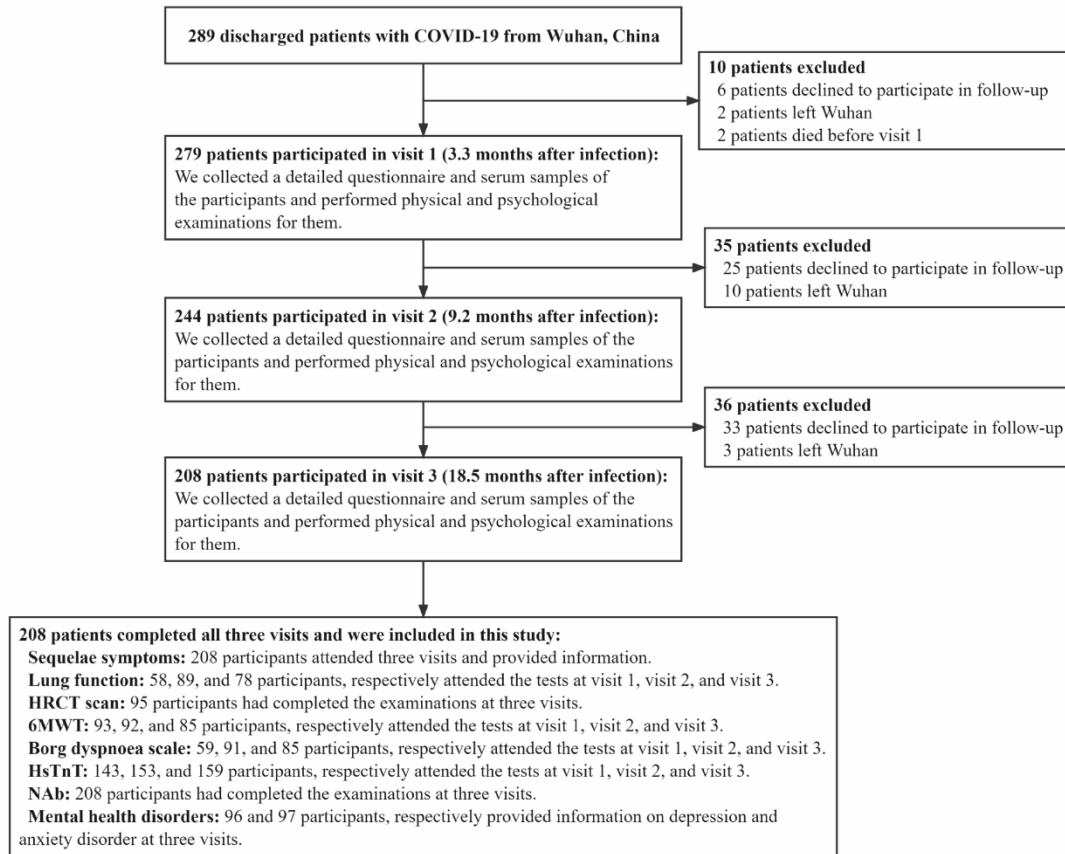

71

72 **eFigure 1. Flow chart of the study.**

73 **Figure Legend:** The profile of the study.

74 HRCT, high-resolution chest CT; 6MWT, 6-minute walking test; hsTnT, highly-sensitive

75 troponin T; NAb, neutralizing antibody.

**eTable 1. Basic characteristics of convalescents according to disease severity.**

| <b>Variables</b>                                          | <b>Mild (N=146)</b> | <b>Severe (N=62)</b> | <b>P value</b> |
|-----------------------------------------------------------|---------------------|----------------------|----------------|
| Age, years                                                | 58 (50, 64)         | 57 (50.3, 64.8)      | 0.862          |
| Gender, n (%)                                             |                     |                      | 0.806          |
| Male                                                      | 71 (48.6)           | 29 (46.8)            |                |
| Female                                                    | 75 (51.4)           | 33 (53.2)            |                |
| Education, n (%)                                          |                     |                      | 0.378          |
| Middle school or lower                                    | 101 (69.2)          | 39 (62.9)            |                |
| College or higher                                         | 45 (30.8)           | 23 (37.1)            |                |
| Household income, n (%)                                   |                     |                      | 0.238          |
| < 50000 RMB/year                                          | 79 (54.1)           | 28 (45.2)            |                |
| ≥ 50000 RMB/year                                          | 67 (45.9)           | 34 (54.8)            |                |
| Cigarette smoking, n (%)                                  |                     |                      | 0.253          |
| Never-smoker                                              | 126 (86.3)          | 57 (91.9)            |                |
| Ever-smoker                                               | 20 (13.7)           | 5 (8.1)              |                |
| Alcohol consumption, n (%)                                |                     |                      | 0.499          |
| Never-drinker                                             | 127 (87.0)          | 56 (90.3)            |                |
| Ever-drinker                                              | 19 (13.0)           | 6 (9.7)              |                |
| Comorbidity, n (%)                                        |                     |                      |                |
| Hypertension                                              | 58 (39.7)           | 17 (27.4)            | 0.091          |
| Diabetes                                                  | 16 (11.0)           | 7 (11.3)             | 0.944          |
| CVD                                                       | 10 (6.8)            | 4 (6.5)              | 1.000          |
| Body mass index                                           | 24.6 (22.9, 27.0)   | 23.4 (22.0, 25.5)    | 0.010          |
| Waist circumference                                       | 90 (83, 98)         | 91 (82, 95)          | 0.537          |
| Duration from symptom onset to the last follow-up, months | 18.4 (18.1, 19.0)   | 18.6 (18.3, 19.3)    | 0.010          |

77 Continuous variables were expressed as median (interquartile range) and compared with the  
78 Mann-Whitney U test. Categorical variables were expressed as frequency (percentage) and  
79 compared with  $\chi^2$  test or Fisher's Exact test.

80 **eTable 2. Physical and psychological health status of convalescents during follow-up according to disease severity.**

| Variables                                 | Mild (N=146)                         |                                   |                       | Severe (N=62)                         |                                   |                        |
|-------------------------------------------|--------------------------------------|-----------------------------------|-----------------------|---------------------------------------|-----------------------------------|------------------------|
|                                           | Visit 1 (3.3 months)                 | Visit 2 (9.2 months)              | Visit 3 (18.5 months) | Visit 1 (3.3 months)                  | Visit 2 (9.2 months)              | Visit 3 (18.5 months)  |
| Sequelae symptoms                         |                                      |                                   |                       |                                       |                                   |                        |
| Any symptoms, n (%)                       | 77 (52.7)                            | 63 (43.2)                         | 59 (40.4)             | 52 (83.9) <sup>b</sup>                | 41 (66.1)                         | 35 (56.5)              |
| Cough, n (%)                              | 28 (19.2) <sup>a,b</sup>             | 10 (6.8)                          | 11 (7.5)              | 13 (21.0)                             | 12 (19.4)                         | 11 (17.7)              |
| Fatigue or muscle weakness, n (%)         | 44 (30.1) <sup>b</sup>               | 30 (20.5)                         | 24 (16.4)             | 29 (46.8) <sup>a,b</sup>              | 15 (24.2)                         | 13 (21.0)              |
| Sleep difficulties, n (%)                 | 47 (32.2) <sup>a,b</sup>             | 27 (18.5)                         | 24 (16.4)             | 22 (35.5)                             | 13 (21.0)                         | 10 (16.1)              |
| Decreased appetite, n (%)                 | 13 (8.9)                             | 4 (2.7)                           | 3 (2.1)               | 8 (12.9)                              | 6 (9.7)                           | 4 (6.5)                |
| Diarrhea or vomiting, n (%)               | 18 (12.3)                            | 8 (5.5)                           | 9 (6.2)               | 3 (4.8)                               | 1 (1.6)                           | 1 (1.6)                |
| Smell or taste disorder, n (%)            | 4 (2.7)                              | 6 (4.1)                           | 6 (4.1)               | 6 (9.7)                               | 3 (4.8)                           | 2 (3.2)                |
| Dizziness or headache, n (%)              | 4 (2.7)                              | 4 (2.7)                           | 6 (4.1)               | 5 (8.1)                               | 3 (4.8)                           | 2 (3.2)                |
| Sore throat, n (%)                        | 4 (2.7)                              | 4 (2.7)                           | 3 (2.1)               | 6 (9.7)                               | 7 (11.3)                          | 3 (4.8)                |
| Chest pain, n (%)                         | 7 (4.8)                              | 6 (4.1)                           | 9 (6.2)               | 5 (8.1)                               | 6 (9.7)                           | 4 (6.5)                |
| Lung function                             |                                      |                                   |                       |                                       |                                   |                        |
| FEV <sub>1</sub> %                        | 94.6 (86.2, 107.7)                   | 97.0 (86.9, 104.6)                | 97.0 (89.1, 105.7)    | 94.0 (79.2, 100.1)                    | 89.0 (80.7, 102.0)                | 96.2 (87.1, 111.6)     |
| FVC%                                      | 92.7 (84.4, 111.5)                   | 94.2 (85.2, 104.8)                | 92.6 (83.0, 103.6)    | 89.6 (79.7, 99.4)                     | 92.0 (80.2, 98.6)                 | 93.8 (85.1, 104.5)     |
| FEV <sub>1</sub> /FVC%                    | 82.9 (79.8, 85.0)                    | 83.5 (80.9, 87.6)                 | 85.6 (81.1, 88.9)     | 83.7 (81.8, 85.6)                     | 82.6 (81.5, 85.4)                 | 87.9 (82.3, 90.8)      |
| FEF <sub>25-75</sub> %                    | 79.4 (70.6, 102.8)                   | 88.3 (74.2, 100.8)                | 89.5 (75.5, 103.3)    | 85.8 (73.8, 92.6)                     | 87.9 (69.5, 107.7)                | 101.9 (76.1, 114.9)    |
| Chest CT                                  |                                      |                                   |                       |                                       |                                   |                        |
| CT abnormal of GGO, n (%)                 | 46 (67.6) <sup>a,b</sup>             | 24 (35.3)                         | 19 (27.9)             | 23 (85.2) <sup>a,b</sup>              | 14 (51.9)                         | 9 (33.3)               |
| CT scores of GGO                          | 5.0 (3.0, 9.0) <sup>a,b</sup>        | 2.0 (0.0, 5.0) <sup>c</sup>       | 1.0 (0.0, 4.0)        | 7.0 (5.0, 13.5) <sup>a,b</sup>        | 4.0 (2.5, 6.0) <sup>c</sup>       | 2.0 (1.0, 4.5)         |
| CT abnormal of RP, n (%)                  | 41 (60.3) <sup>a,b</sup>             | 27 (39.7)                         | 22 (32.4)             | 20 (74.1)                             | 20 (74.1)                         | 12 (44.4)              |
| CT scores of RP                           | 6.0 (3.0, 12.2) <sup>a,b</sup>       | 3.0 (2.0, 8.0)                    | 2.0 (1.0, 6.0)        | 11.0 (6.0, 16.0) <sup>a,b</sup>       | 6.0 (4.5, 10.0)                   | 4.0 (2.0, 8.0)         |
| 6-minute walk test                        |                                      |                                   |                       |                                       |                                   |                        |
| Distance, m                               | 517.4 (481.5, 555.5) <sup>a,b</sup>  | 562.2 (520.8, 605.4) <sup>c</sup> | 533.0 (508.2, 559.5)  | 511.0 (471.9, 555.0) <sup>a</sup>     | 579.0 (536.6, 620.9)              | 542.0 (511.0, 605.0)   |
| Predicted distance%                       | 93.5 (86.2, 99.0) <sup>a</sup>       | 100.5 (95.0, 106.0)               | 96.5 (91.5, 104.0)    | 90.0 (81.5, 99.5) <sup>a</sup>        | 100.0 (93.2, 107.0)               | 94.0 (87.0, 100.0)     |
| Borg dyspnea scale $\geq 1$ , n (%)       | 25 (56.8) <sup>a,b</sup>             | 9 (13.8) <sup>c</sup>             | 1 (1.7)               | 5 (33.3)                              | 6 (23.1)                          | 3 (12.0)               |
| hsTnT (ng/L)                              | 4.5 (3.0, 7.5)                       | 4.7 (3.0, 7.0)                    | 4.4 (3.0, 6.8)        | 3.9 (3.0, 7.4)                        | 3.7 (3.0, 6.1)                    | 3.6 (3.0, 5.2)         |
| hsTnT $\geq 14$ ng/L, n (%)               | 7 (7.0)                              | 4 (3.8)                           | 4 (3.4)               | 3 (7.0)                               | 1 (2.1)                           | 2 (4.7)                |
| NT <sub>50</sub> for serum SARS-CoV-2 NAb | 768.0 (367.8, 1694.5) <sup>a</sup>   | 293.5 (140.2, 592.2) <sup>c</sup> | 658.5 (284.0, 1283.2) | 1001.5 (448.5, 2032.8) <sup>a</sup>   | 291.5 (160.5, 614.5) <sup>c</sup> | 711.0 (346.5, 1243.5)  |
| Unvaccinated group                        | 944.5 (469.2, 1914.2) <sup>a,b</sup> | 297.5 (138.2, 747.2)              | 234.0 (112.2, 484.8)  | 1235.5 (519.8, 2675.5) <sup>a,b</sup> | 504.5 (247.8, 645.0)              | 333.0 (231.8, 518.8)   |
| Vaccinated group                          | 660.5 (289.2, 1393.5) <sup>a</sup>   | 293.5 (140.5, 586.8) <sup>c</sup> | 837.5 (479.2, 1451.2) | 851.0 (440.0, 1853.5) <sup>a</sup>    | 237.0 (144.8, 501.5) <sup>c</sup> | 1059.0 (549.5, 1499.8) |
| Mental health disorders                   |                                      |                                   |                       |                                       |                                   |                        |
| Depression, score                         | 5.5 (2.0, 9.2) <sup>b</sup>          | 3.5 (1.0, 8.0) <sup>c</sup>       | 1.0 (0.0, 4.0)        | 4.0 (1.0, 8.2)                        | 4.0 (1.0, 8.2)                    | 2.0 (0.0, 4.2)         |
| Depression score $\geq 5$                 | 39 (57.4) <sup>b</sup>               | 30 (44.1) <sup>c</sup>            | 16 (23.5)             | 14 (50)                               | 13 (46.4)                         | 7 (25)                 |
| Anxiety disorder, score                   | 4.0 (0.0, 8.0) <sup>b</sup>          | 1.0 (0.0, 5.0)                    | 0.0 (0.0, 4.0)        | 1.5 (0.0, 5.2)                        | 2.0 (0.0, 5.0)                    | 0.0 (0.0, 3.0)         |
| Anxiety score $\geq 5$                    | 27 (39.1)                            | 21 (30.4)                         | 16 (23.2)             | 9 (32.1)                              | 8 (28.6)                          | 6 (21.4)               |

81 Data were expressed as median (interquartile range) or frequency (percentage). Kruskal-Wallis test was applied for group comparisons of

82 continuous variables, and  $\chi^2$  test or Fisher Exact tests were performed to analyse the categorical variables. CT: computed tomography; FEV<sub>1</sub>:

83 forced expiratory volume in one second; FVC: forced vital capacity; FEF<sub>25-75</sub>: forced expiratory flow between 25% and 75% of vital capacity;  
84 GGO, ground-glass opacity; RP, reticular pattern; hsTnT, highly-sensitive troponin T; NT<sub>50</sub>, the half-maximal inhibitory concentration; NAb,  
85 neutralizing antibody. <sup>a</sup> Significant difference between visit 1 and visit 2 groups ( $P < 0.05$ ). <sup>b</sup> Significant difference between visit 1 and visit 3  
86 groups ( $P < 0.05$ ). <sup>c</sup> Significant difference between visit 2 and visit 3 groups ( $P < 0.05$ ).

87 **eTable 3. Physical and psychological health status of convalescents in different disease severity during follow-up.**

| Variables                                       | Visit 1 (3.3 months)  |                        |                | Visit 2 (9.2 months) |                      |                | Visit 3 (18.5 months) |                        |                |
|-------------------------------------------------|-----------------------|------------------------|----------------|----------------------|----------------------|----------------|-----------------------|------------------------|----------------|
|                                                 | Mild                  | Severe                 | <i>P</i> value | Mild                 | Severe               | <i>P</i> value | Mild                  | Severe                 | <i>P</i> value |
| <b>Sequelae symptoms</b>                        |                       |                        |                |                      |                      |                |                       |                        |                |
| Any sequelae symptoms, n (%)                    | 77 (52.7%)            | 52 (83.9%)             | <0.001         | 63 (43.2%)           | 41 (66.1%)           | 0.004          | 59 (40.4%)            | 35 (56.5%)             | 0.048          |
| Cough, n (%)                                    | 28 (19.2%)            | 13 (21.0%)             | 0.915          | 10 (6.8%)            | 12 (19.4%)           | 0.015          | 11 (7.5%)             | 11 (17.7%)             | 0.052          |
| Fatigue, n (%)                                  | 44 (30.1%)            | 29 (46.8%)             | 0.032          | 30 (20.5%)           | 15 (24.2%)           | 0.689          | 24 (16.4%)            | 13 (21.0%)             | 0.560          |
| Sleep difficulties, n (%)                       | 47 (32.2%)            | 22 (35.5%)             | 0.764          | 27 (18.5%)           | 13 (21.0%)           | 0.824          | 24 (16.4%)            | 10 (16.1%)             | 1.000          |
| Decreased appetite, n (%)                       | 13 (8.9%)             | 8 (12.9%)              | 0.533          | 4 (2.7%)             | 6 (9.7%)             | 0.068          | 3 (2.1%)              | 4 (6.5%)               | 0.200          |
| Diarrhea or vomiting, n (%)                     | 18 (12.3%)            | 3 (4.8%)               | 0.165          | 8 (5.5%)             | 1 (1.6%)             | 0.285          | 9 (6.2%)              | 1 (1.6%)               | 0.287          |
| Smell or taste disorder, n (%)                  | 4 (2.7%)              | 6 (9.7%)               | 0.068          | 6 (4.1%)             | 3 (4.8%)             | 1.000          | 6 (4.1%)              | 2 (3.2%)               | 1.000          |
| Dizziness or headache, n (%)                    | 4 (2.7%)              | 5 (8.1%)               | 0.130          | 4 (2.7%)             | 3 (4.8%)             | 0.428          | 6 (4.1%)              | 2 (3.2%)               | 1.000          |
| Sore throat, n (%)                              | 4 (2.7%)              | 6 (9.7%)               | 0.068          | 4 (2.7%)             | 7 (11.3%)            | 0.018          | 3 (2.1%)              | 3 (4.8%)               | 0.366          |
| Chest pain, n (%)                               | 7 (4.8%)              | 5 (8.1%)               | 0.347          | 6 (4.1%)             | 6 (9.7%)             | 0.189          | 9 (6.2%)              | 4 (6.5%)               | 1.000          |
| <b>Lung function</b>                            |                       |                        |                |                      |                      |                |                       |                        |                |
| FEV <sub>1</sub> %                              | 94.6 (86.2, 107.7)    | 94.0 (79.2, 100.1)     | 0.338          | 97.0 (86.9, 104.6)   | 89.0 (80.7, 102.0)   | 0.208          | 97.0 (89.1, 105.7)    | 96.2 (87.1, 111.6)     | 0.870          |
| FVC%                                            | 92.7 (84.4, 111.5)    | 89.6 (79.7, 99.4)      | 0.250          | 94.2 (85.2, 104.8)   | 92.0 (80.2, 98.6)    | 0.294          | 92.6 (83.0, 103.6)    | 93.8 (85.1, 104.5)     | 0.978          |
| FEV <sub>1</sub> /FVC%                          | 82.9 (79.8, 85.0)     | 83.7 (81.8, 85.6)      | 0.399          | 83.5 (80.9, 87.6)    | 82.6 (81.5, 85.4)    | 0.739          | 85.6 (81.1, 88.9)     | 87.9 (82.3, 90.8)      | 0.338          |
| FEF <sub>25-75</sub> %                          | 79.4 (70.6, 102.8)    | 85.8 (73.8, 92.6)      | 0.613          | 88.3 (74.2, 100.8)   | 87.9 (69.5, 107.7)   | 0.985          | 89.5 (75.5, 103.3)    | 101.9 (76.1, 114.9)    | 0.287          |
| <b>Chest CT</b>                                 |                       |                        |                |                      |                      |                |                       |                        |                |
| CT abnormal of GGO, n (%)                       | 46 (67.6%)            | 23 (85.2%)             | 0.140          | 24 (35.3%)           | 14 (51.9%)           | 0.210          | 19 (27.9%)            | 9 (33.3%)              | 0.787          |
| CT scores of GGO                                | 5.0 (3.0, 9.0)        | 7.0 (5.0, 13.5)        | 0.029          | 2.0 (0.0, 5.0)       | 4.0 (2.5, 6.0)       | 0.042          | 1.0 (0.0, 4.0)        | 2.0 (1.0, 4.5)         | 0.061          |
| CT abnormal of RP, n (%)                        | 41 (60.3%)            | 20 (74.1%)             | 0.305          | 27 (39.7%)           | 20 (74.1%)           | 0.005          | 22 (32.4%)            | 12 (44.4%)             | 0.383          |
| CT scores of RP                                 | 6.0 (3.0, 12.2)       | 11.0 (6.0, 16.0)       | 0.011          | 3.0 (2.0, 8.0)       | 6.0 (4.5, 10.0)      | 0.024          | 2.0 (1.0, 6.0)        | 4.0 (2.0, 8.0)         | 0.093          |
| <b>6-minute walk test</b>                       |                       |                        |                |                      |                      |                |                       |                        |                |
| Distance, m                                     | 517.4 (481.5, 555.5)  | 511.0 (471.9, 555.0)   | 0.963          | 562.2 (520.8, 605.4) | 579.0 (536.6, 620.9) | 0.425          | 533.0 (508.2, 559.5)  | 542.0 (511.0, 605.0)   | 0.274          |
| Predicted distance%                             | 93.5 (86.2, 99.0)     | 90.0 (81.5, 99.5)      | 0.253          | 100.5 (95.0, 106.0)  | 100.0 (93.2, 107.0)  | 0.784          | 96.5 (91.5, 104.0)    | 94.0 (87.0, 100.0)     | 0.382          |
| Borg dyspnea scale ≥1, n (%)                    | 25 (56.8%)            | 5 (33.3%)              | 0.203          | 9 (13.8%)            | 6 (23.1%)            | 0.350          | 1 (1.7%)              | 3 (12.0%)              | 0.074          |
| hsTnT (ng/L)                                    | 4.5 (3.0, 7.5)        | 3.9 (3.0, 7.4)         | 0.513          | 4.7 (3.0, 7.0)       | 3.7 (3.0, 6.1)       | 0.145          | 4.4 (3.0, 6.8)        | 3.6 (3.0, 5.2)         | 0.057          |
| hsTnT ≥14 ng/L, n (%)                           | 7 (7.0)               | 3 (7.0)                | 1.000          | 4 (3.8)              | 1 (2.1)              | 1.000          | 4 (3.4)               | 2 (4.7)                | 0.662          |
| <b>NT<sub>50</sub> for serum SARS-CoV-2 NAb</b> |                       |                        |                |                      |                      |                |                       |                        |                |
| Unvaccinated group                              | 768.0 (367.8, 1694.5) | 1001.5 (448.5, 2032.8) | 0.144          | 293.5 (140.2, 592.2) | 291.5 (160.5, 614.5) | 0.902          | 658.5 (284.0, 1283.2) | 711.0 (346.5, 1243.5)  | 0.450          |
| Vaccinated group                                | 944.5 (469.2, 1914.2) | 1235.5 (519.8, 2675.5) | 0.569          | 297.5 (138.2, 747.2) | 504.5 (247.8, 645.0) | 0.430          | 234.0 (112.2, 484.8)  | 333.0 (231.8, 518.8)   | 0.215          |
|                                                 | 660.5 (289.2, 1393.5) | 851.0 (440.0, 1853.5)  | 0.182          | 293.5 (140.5, 586.8) | 237.0 (144.8, 501.5) | 0.640          | 837.5 (479.2, 1451.2) | 1059.0 (549.5, 1499.8) | 0.338          |
| <b>Mental health disorders</b>                  |                       |                        |                |                      |                      |                |                       |                        |                |
| Depression, score                               | 5.5 (2.0, 9.2)        | 4.0 (1.0, 8.2)         | 0.249          | 3.5 (1.0, 8.0)       | 4.0 (1.0, 8.2)       | 0.903          | 1.0 (0.0, 4.0)        | 2.0 (0.0, 4.2)         | 0.654          |
| Depression score ≥5                             | 39 (57.4)             | 14 (50)                | 0.665          | 30 (44.1)            | 13 (46.4)            | 1.000          | 16 (23.5)             | 7 (25)                 | 1.000          |
| Anxiety disorder, score                         | 4.0 (0.0, 8.0)        | 1.5 (0.0, 5.2)         | 0.231          | 1.0 (0.0, 5.0)       | 2.0 (0.0, 5.0)       | 0.863          | 0.0 (0.0, 4.0)        | 0.0 (0.0, 3.0)         | 0.681          |
| Anxiety score ≥5                                | 27 (39.1)             | 9 (32.1)               | 0.679          | 30 (44.1)            | 13 (46.4)            | 1.000          | 16 (23.5)             | 7 (25)                 | 1.000          |

88 Data were expressed as median (interquartile range) or frequency (percentage). Mann-Whitney U test was applied for group comparisons of

89 continuous variables, and  $\chi^2$  test or Fisher Exact tests were performed to analyse the categorical variables. CT: computed tomography; FEV<sub>1</sub>:



90 forced expiratory volume in one second; FVC: forced vital capacity; FEF<sub>25-75</sub>: forced expiratory flow between 25% and 75% of vital capacity;  
91 GGO, ground-glass opacity; RP, reticular pattern; hsTnT, highly-sensitive troponin T; NT<sub>50</sub>, the half-maximal inhibitory concentration; NAb,  
92 neutralizing antibody.

93 **eTable 4. Lung function, chest CT, and 6-minute walk test variation of the COVID-19 survivors during follow-up according to**  
 94 **disease severity.**

|                                  | <b>Total population</b> | <b>Mild</b>             | <b>Severe</b>           | <b>P value</b> |
|----------------------------------|-------------------------|-------------------------|-------------------------|----------------|
| <b>Lung function</b>             | <b>N=45</b>             | <b>N=34</b>             | <b>N=11</b>             |                |
| FEV <sub>1</sub> %, Δ(v2-v1)     | -0.005 (-0.093, 0.109)  | -0.008 (-0.091, 0.114)  | 0.000 (-0.059, 0.047)   | 0.885          |
| FEV <sub>1</sub> %, Δ(v3-v1)     | 0.013 (-0.081, 0.138)   | 0.001 (-0.110, 0.137)   | 0.016 (-0.030, 0.151)   | 0.316          |
| FVC%, Δ(v2-v1)                   | -0.014 (-0.110, 0.091)  | -0.029 (-0.118, 0.142)  | 0.000 (-0.085, 0.039)   | 0.864          |
| FVC%, Δ(v3-v1)                   | -0.023 (-0.119, 0.172)  | -0.023 (-0.114, 0.183)  | -0.007 (-0.125, 0.140)  | 1.000          |
| FEV <sub>1</sub> /FVC%, Δ(v2-v1) | 0.000 (-0.036, 0.030)   | -0.002 (-0.044, 0.026)  | 0.013 (-0.018, 0.046)   | 0.262          |
| FEV <sub>1</sub> /FVC%, Δ(v3-v1) | 0.048 (-0.014, 0.080)   | 0.043 (-0.017, 0.077)   | 0.063 (0.016, 0.081)    | 0.267          |
| FEF <sub>25-75%</sub> , Δ(v2-v1) | -0.022 (-0.118, 0.146)  | -0.026 (-0.113, 0.105)  | 0.000 (-0.098, 0.223)   | 0.570          |
| FEF <sub>25-75%</sub> , Δ(v3-v1) | 0.085 (-0.046, 0.221)   | 0.039 (-0.051, 0.149)   | 0.322 (0.071, 0.388)    | 0.073          |
| <b>CT</b>                        | <b>N=95</b>             | <b>N=68</b>             | <b>N=27</b>             |                |
| CT abnormal of GGO, Δ(v2-v1)     | 0.000 (-1.000, 0.000)   | 0.000 (-1.000, 0.000)   | 0.000 (-1.000, 0.000)   | 0.927          |
| CT abnormal of GGO, Δ(v3-v1)     | 0.000 (-1.000, 0.000)   | 0.000 (-1.000, 0.000)   | -1.000 (-1.000, 0.000)  | 0.284          |
| CT scores of GGO, Δ(v2-v1)       | -0.500 (-0.728, -0.408) | -0.500 (-0.771, -0.400) | -0.526 (-0.613, -0.477) | 0.737          |
| CT scores of GGO, Δ(v3-v1)       | -0.765 (-1.000, -0.595) | -0.778 (-1.000, -0.560) | -0.727 (-0.833, -0.649) | 0.513          |
| CT abnormal of RP, Δ(v2-v1)      | 0.000 (0.000, 0.000)    | 0.000 (0.000, 0.000)    | 0.000 (0.000, 0.000)    | 0.049          |
| CT abnormal of RP, Δ(v3-v1)      | 0.000 (-1.000, 0.000)   | 0.000 (-1.000, 0.000)   | 0.000 (-1.000, 0.000)   | 0.529          |
| CT scores of RP, Δ(v2-v1)        | -0.333 (-0.500, -0.146) | -0.314 (-0.500, -0.062) | -0.375 (-0.500, -0.258) | 0.141          |
| CT scores of RP, Δ(v3-v1)        | -0.500 (-0.750, -0.222) | -0.456 (-0.750, -0.172) | -0.615 (-0.750, -0.367) | 0.252          |
| <b>6-minute walk test</b>        | <b>N=84</b>             | <b>N=60</b>             | <b>N=24</b>             |                |
| Distance, m, Δ(v2-v1)            | 0.072 (0.018, 0.137)    | 0.073 (0.016, 0.148)    | 0.064 (0.029, 0.136)    | 0.984          |
| Distance, m, Δ(v3-v1)            | 0.029 (-0.021, 0.091)   | 0.022 (-0.021, 0.100)   | 0.045 (-0.008, 0.088)   | 0.652          |
| Predicted distance%, Δ(v2-v1)    | 0.071 (0.020, 0.133)    | 0.072 (0.017, 0.129)    | 0.070 (0.033, 0.138)    | 0.593          |
| Predicted distance%, Δ(v3-v1)    | 0.034 (-0.026, 0.101)   | 0.033 (-0.031, 0.096)   | 0.040 (-0.010, 0.106)   | 0.513          |
| <b>Borg dyspnea scale</b>        | <b>N=51</b>             | <b>N=39</b>             | <b>N=12</b>             |                |
| Borg dyspnea scale ≥1, Δ(v2-v1)  | 0.000 (-1.000, 0.000)   | 0.000 (-1.000, 0.000)   | 0.000 (0.000, 0.000)    | 0.089          |
| Borg dyspnea scale ≥1, Δ(v3-v1)  | 0.000 (-1.000, 0.000)   | -1.000 (-1.000, 0.000)  | 0.000 (0.000, 0.000)    | 0.025          |

95 Data were expressed as median (interquartile range). Mann-Whitney U test was applied for group comparisons.  $\Delta(v2-v1)$  refers to the variation  
96 between visit 2 and visit 1;  $\Delta(v3-v1)$  refers to the variation between visit 3 and visit 1. CT: computed tomography; FEV<sub>1</sub>: forced expiratory volume  
97 in one second; FVC: forced vital capacity; FEF<sub>25-75</sub>: forced expiratory flow between 25% and 75% of vital capacity; GGO, ground-glass opacity;  
98 RP, reticular pattern.

99 **eTable 5. Detailed inpatient information of the participants.**

| <b>Variables</b>                                                     | <b>Total population<br/>(N=208)</b> | <b>Mild<br/>(N=146)</b> | <b>Severe<br/>(N=62)</b> | <b>P value</b> |
|----------------------------------------------------------------------|-------------------------------------|-------------------------|--------------------------|----------------|
| Wards, n (%)                                                         |                                     |                         |                          | <0.001         |
| Medical ward                                                         | 186 (89.4)                          | 133 (91.1)              | 53 (85.5)                |                |
| Fangcang shelter hospitals                                           | 13 (6.2)                            | 12 (8.2)                | 1 (1.6)                  |                |
| ICU                                                                  | 9 (4.3)                             | 1 (0.7)                 | 8 (12.9)                 |                |
| Length of total hospital stay, days, median<br>(interquartile range) | 27.0 (17.0, 35.0)                   | 25.0 (15.2, 32.0)       | 29.0 (22.0, 37.0)        | 0.003          |
| Length of medical ward stay                                          | 25.0 (14.0, 33.2)                   | 23.0 (13.0, 30.0)       | 28.0 (18.2, 35.8)        | 0.029          |
| Length of Fangcang shelter hospital stay                             | 0.0 (0.0, 0.0)                      | 0.0 (0.0, 0.0)          | 0.0 (0.0, 0.0)           | 0.079          |
| Length of ICU stay                                                   | 0.0 (0.0, 0.0)                      | 0.0 (0.0, 0.0)          | 0.0 (0.0, 0.0)           | <0.001         |
| Treatment received during hospital stay, n (%)                       |                                     |                         |                          |                |
| Oxygen therapy                                                       | 162 (77.9)                          | 106 (72.6)              | 56 (90.3)                | 0.008          |
| Non-invasive ventilation                                             | 5 (2.4)                             | 0 (0.0)                 | 5 (8.1)                  | 0.002          |
| Invasive ventilation                                                 | 1 (0.5)                             | 0 (0.0)                 | 1 (1.6)                  | 0.298          |
| Traditional Chinese medicine                                         | 190 (91.3)                          | 135 (92.5)              | 55 (88.7)                | 0.541          |
| Immune therapy                                                       | 38 (18.3)                           | 17 (11.6)               | 21 (33.9)                | <0.001         |
| Corticosteroids                                                      | 23 (11.1)                           | 9 (6.2)                 | 14 (22.6)                | 0.001          |
| Remdesivir                                                           | 17 (8.2)                            | 7 (4.8)                 | 10 (16.1)                | 0.014          |
| Interferon                                                           | 12 (5.8)                            | 7 (4.8)                 | 5 (8.1)                  | 0.347          |
| COVID-19 convalescent plasma                                         | 5 (2.4)                             | 3 (2.1)                 | 2 (3.2)                  | 0.636          |
| Continuous renal replacement therapy<br>(CRRT)                       | 0 (0)                               | 0 (0)                   | 0 (0)                    | -              |
| Other treatments                                                     | 15 (7.2)                            | 8 (5.5)                 | 7 (11.3)                 | 0.151          |

100 Continuous variables were expressed as median (interquartile range) and compared with the  
101 Mann-Whitney U test. Categorical variables were expressed as frequency (percentage) and  
102 were compared with  $\chi^2$  test or Fisher's Exact test.

**eTable 6. Physical and psychological health status of convalescents during follow-up according to the length of hospital stay.**

|                                           | Length of hospital stay < 27 days (N=101) |                                   |                       | Length of hospital stay ≥ 27 days (N=107) |                                   |                        |
|-------------------------------------------|-------------------------------------------|-----------------------------------|-----------------------|-------------------------------------------|-----------------------------------|------------------------|
|                                           | Visit 1                                   | Visit 2                           | Visit 3               | Visit 1                                   | Visit 2                           | Visit 3                |
| <b>Sequelae symptoms</b>                  |                                           |                                   |                       |                                           |                                   |                        |
| Any sequelae symptoms, n (%)              | 51 (50.5)                                 | 48 (47.5)                         | 45 (44.6)             | 78 (72.9) <sup>a,b</sup>                  | 56 (52.3)                         | 49 (45.8)              |
| Cough, n (%)                              | 16 (15.8)                                 | 11 (10.9)                         | 14 (13.9)             | 25 (23.4) <sup>a,b</sup>                  | 11 (10.3)                         | 8 (7.5)                |
| Fatigue or muscle weakness, n (%)         | 30 (29.7)                                 | 18 (17.8)                         | 16 (15.8)             | 43 (40.2) <sup>a,b</sup>                  | 27 (25.2)                         | 21 (19.6)              |
| Sleep difficulties, n (%)                 | 29 (28.7)                                 | 18 (17.8)                         | 16 (15.8)             | 40 (37.4) <sup>a,b</sup>                  | 22 (20.6)                         | 18 (16.8)              |
| Decreased appetite, n (%)                 | 8 (7.9)                                   | 3 (3.0)                           | 4 (4.0)               | 13 (12.1)                                 | 7 (6.5)                           | 3 (2.8)                |
| Diarrhea or vomiting, n (%)               | 7 (6.9)                                   | 3 (3.0)                           | 3 (3.0)               | 14 (13.1)                                 | 6 (5.6)                           | 7 (6.5)                |
| Smell or taste disorder, n (%)            | 2 (2.0)                                   | 4 (4.0)                           | 4 (4.0)               | 8 (7.5)                                   | 5 (4.7)                           | 4 (3.7)                |
| Dizziness or headache, n (%)              | 3 (3.0)                                   | 3 (3.0)                           | 5 (5.0)               | 6 (5.6)                                   | 4 (3.7)                           | 3 (2.8)                |
| Sore throat, n (%)                        | 3 (3.0)                                   | 4 (4.0)                           | 1 (1.0)               | 7 (6.5)                                   | 7 (6.5)                           | 5 (4.7)                |
| Chest pain, n (%)                         | 6 (5.9)                                   | 6 (5.9)                           | 7 (6.9)               | 6 (5.6)                                   | 6 (5.6)                           | 6 (5.6)                |
| <b>Lung function</b>                      |                                           |                                   |                       |                                           |                                   |                        |
| FEV <sub>1</sub> %                        | 91.6 (79.2, 107.4)                        | 90.8 (81.4, 101.5)                | 93.7 (86.0, 105.6)    | 94.7 (86.6, 104.9)                        | 97.3 (87.7, 104.7)                | 100.4 (91.1, 108.4)    |
| FVC%                                      | 91.5 (78.1, 108.5)                        | 91.4 (82.7, 100.4)                | 90.2 (83.2, 101.8)    | 92.7 (84.8, 108.4)                        | 93.8 (86.4, 104.5)                | 96.0 (86.6, 104.4)     |
| FEV <sub>1</sub> /FVC%                    | 82.8 (81.0, 84.5)                         | 82.2 (80.6, 85.6)                 | 85.7 (82.2, 88.8)     | 83.5 (79.3, 85.4)                         | 84.7 (81.4, 87.6)                 | 85.3 (81.0, 90.2)      |
| FEF <sub>25-75</sub> %                    | 78.1 (69.8, 85.4)                         | 78.0 (68.8, 107.9)                | 87.3 (73.2, 112.9)    | 85.8 (73.6, 97.2)                         | 89.2 (76.1, 100.4)                | 93.1 (76.1, 109.6)     |
| <b>Chest CT</b>                           |                                           |                                   |                       |                                           |                                   |                        |
| CT abnormal of GGO, n (%)                 | 26 (70.3) <sup>a,b</sup>                  | 12 (32.4)                         | 7 (18.9)              | 43 (74.1) <sup>a,b</sup>                  | 26 (44.8)                         | 21 (36.2)              |
| CT scores of GGO                          | 5.0 (3.0, 9.0) <sup>a,b</sup>             | 2.0 (1.0, 5.0) <sup>c</sup>       | 1.0 (0.0, 3.0)        | 6.0 (3.2, 11.8) <sup>a,b</sup>            | 3.0 (1.0, 6.0) <sup>c</sup>       | 1.5 (0.0, 4.0)         |
| CT abnormal of RP, n (%)                  | 25 (67.6) <sup>b</sup>                    | 15 (40.5)                         | 9 (24.3)              | 36 (62.1)                                 | 32 (55.2)                         | 25 (43.1)              |
| CT scores of RP                           | 7.0 (3.0, 11.0) <sup>a,b</sup>            | 3.0 (2.0, 7.0)                    | 2.0 (1.0, 4.0)        | 8.5 (4.0, 15.8) <sup>a,b</sup>            | 5.0 (2.0, 10.8)                   | 4.0 (1.0, 8.0)         |
| <b>6-minute walk test</b>                 |                                           |                                   |                       |                                           |                                   |                        |
| Distance, m                               | 511.0 (475.5, 558.5) <sup>a</sup>         | 566.8 (522.0, 607.2)              | 531.0 (508.0, 570.0)  | 520.5 (484.1, 554.0) <sup>a,b</sup>       | 563.8 (526.1, 609.9) <sup>c</sup> | 535.0 (510.8, 566.2)   |
| Predicted distance%                       | 93.0 (85.5, 100.0) <sup>a</sup>           | 103.0 (96.0, 109.8)               | 98.0 (89.0, 103.0)    | 91.5 (86.0, 99.0) <sup>a</sup>            | 100.0 (93.2, 105.0)               | 95.0 (89.5, 101.5)     |
| Borg dyspnea scale ≥ 1, n (%)             | 8 (47.1) <sup>a,b</sup>                   | 3 (8.8)                           | 1 (3.0)               | 22 (52.4) <sup>a,b</sup>                  | 12 (21.1) <sup>c</sup>            | 3 (5.8)                |
| hsTnT (ng/L)                              | 4.7 (3.0, 7.2)                            | 5.0 (3.1, 7.1)                    | 4.5 (3.1, 6.8)        | 4.2 (3.0, 7.6)                            | 3.9 (3.0, 6.4)                    | 3.9 (3.0, 6.3)         |
| hsTnT ≥ 14 ng/L, n (%)                    | 4 (5.6)                                   | 2 (3.0)                           | 4 (5.0)               | 6 (8.3)                                   | 3 (3.5)                           | 2 (2.5)                |
| NT <sub>50</sub> for serum SARS-CoV-2 NAb | 774.0 (341.0, 1806.0) <sup>a</sup>        | 250.0 (119.0, 541.0) <sup>c</sup> | 570.0 (271.0, 1087.0) | 922.0 (433.0, 1684.5) <sup>a</sup>        | 356.0 (200.5, 643.0) <sup>c</sup> | 813.0 (378.0, 1452.0)  |
| Unvaccinated group                        | 1213.0 (679.2, 2081.2) <sup>a,b</sup>     | 297.5 (154.0, 573.2)              | 262.0 (114.5, 499.8)  | 910.5 (415.0, 1977.8) <sup>a,b</sup>      | 439.0 (201.8, 747.2)              | 301.5 (190.5, 483.5)   |
| Vaccinated group                          | 590.0 (234.5, 1649.0) <sup>a</sup>        | 228.0 (116.5, 510.0) <sup>c</sup> | 698.0 (386.0, 1281.5) | 922.0 (450.0, 1503.5) <sup>a</sup>        | 349.0 (197.5, 596.0) <sup>c</sup> | 1040.0 (654.5, 1627.5) |
| <b>Mental health disorders</b>            |                                           |                                   |                       |                                           |                                   |                        |
| Depression, score                         | 5.0 (1.0, 9.0) <sup>b</sup>               | 3.5 (1.0, 8.0) <sup>c</sup>       | 0.5 (0.0, 3.8)        | 5.0 (2.0, 8.8) <sup>b</sup>               | 4.0 (1.0, 7.8) <sup>c</sup>       | 2.0 (0.0, 5.0)         |
| Depression score ≥ 5                      | 20 (52.6) <sup>b</sup>                    | 18 (47.4) <sup>c</sup>            | 6 (15.8)              | 33 (56.9) <sup>b</sup>                    | 25 (43.1)                         | 17 (29.3)              |
| Anxiety disorder, score                   | 3.0 (0.0, 6.0) <sup>b</sup>               | 0.5 (0.0, 3.8) <sup>c</sup>       | 0.0 (0.0, 0.0)        | 4.0 (0.0, 7.5)                            | 3.0 (0.0, 5.0)                    | 2.0 (0.0, 5.0)         |
| Anxiety score ≥ 5                         | 13 (34.2)                                 | 8 (21.1)                          | 5 (13.2)              | 23 (39.0)                                 | 21 (35.6)                         | 17 (28.8)              |

104 Data were expressed as median (interquartile range) or frequency (percentage). Kruskal-Wallis test was applied for group comparisons of  
105 continuous variables, and  $\chi^2$  test or Fisher Exact tests were performed to analyze the categorical variables. CT: computed tomography; FEV<sub>1</sub>:  
106 forced expiratory volume in one second; FVC: forced vital capacity; FEF<sub>25-75</sub>: forced expiratory flow between 25% and 75% of vital capacity;  
107 GGO, ground-glass opacity; RP, reticular pattern; hsTnT, highly-sensitive troponin T; NT<sub>50</sub>, the half-maximal inhibitory concentration; NAb,  
108 neutralizing antibody. <sup>a</sup> Significant difference between visit 1 and visit 2 groups ( $P < 0.05$ ). <sup>b</sup> Significant difference between visit 1 and visit 3  
109 groups ( $P < 0.05$ ). <sup>c</sup> Significant difference between visit 2 and visit 3 groups ( $P < 0.05$ ).

**eTable 7. Physical and psychological health status of convalescents during follow-up according to the ICU stay record.**

|                                           | Non-ICU (N=199)                       |                                   |                       | ICU (N=9)              |                      |                       |
|-------------------------------------------|---------------------------------------|-----------------------------------|-----------------------|------------------------|----------------------|-----------------------|
|                                           | Visit 1                               | Visit 2                           | Visit 3               | Visit 1                | Visit 2              | Visit 3               |
| <b>Sequelae symptoms</b>                  |                                       |                                   |                       |                        |                      |                       |
| Any sequelae symptoms, n (%)              | 122 (61.3) <sup>a,b</sup>             | 99 (49.7)                         | 88 (44.2)             | 7 (77.8)               | 5 (55.6)             | 6 (66.7)              |
| Cough, n (%)                              | 39 (19.6) <sup>a,b</sup>              | 21 (10.6)                         | 22 (11.1)             | 2 (22.2)               | 1 (11.1)             | 0 (0.0)               |
| Fatigue or muscle weakness, n (%)         | 68 (34.2) <sup>a,b</sup>              | 43 (21.6)                         | 34 (17.1)             | 5 (55.6)               | 2 (22.2)             | 3 (33.3)              |
| Sleep difficulties, n (%)                 | 65 (32.7) <sup>a,b</sup>              | 39 (19.6)                         | 31 (15.6)             | 4 (44.4)               | 1 (11.1)             | 3 (33.3)              |
| Decreased appetite, n (%)                 | 21 (10.6) <sup>b</sup>                | 9 (4.5)                           | 7 (3.5)               | 0 (0.0)                | 1 (11.1)             | 0 (0.0)               |
| Diarrhea or vomiting, n (%)               | 21 (10.6)                             | 9 (4.5)                           | 10 (5.0)              | 0 (0.0)                | 0 (0.0)              | 0 (0.0)               |
| Smell or taste disorder, n (%)            | 10 (5.0)                              | 9 (4.5)                           | 8 (4.0)               | 0 (0.0)                | 0 (0.0)              | 0 (0.0)               |
| Dizziness or headache, n (%)              | 9 (4.5)                               | 7 (3.5)                           | 8 (4.0)               | 0 (0.0)                | 0 (0.0)              | 0 (0.0)               |
| Sore throat, n (%)                        | 9 (4.5)                               | 9 (4.5)                           | 4 (2.0)               | 1 (11.1)               | 2 (22.2)             | 2 (22.2)              |
| Chest pain, n (%)                         | 12 (6.0)                              | 11 (5.5)                          | 12 (6.0)              | 0 (0.0)                | 1 (11.1)             | 1 (11.1)              |
| <b>Lung function</b>                      |                                       |                                   |                       |                        |                      |                       |
| FEV <sub>1</sub> %                        | 94.3 (83.4, 107.5)                    | 96.3 (86.3, 103.8)                | 95.1 (88.4, 107.1)    | 89.1 (80.4, 98.0)      | 101.0 (86.5, 105.3)  | 105.2 (98.3, 113.8)   |
| FVC%                                      | 92.6 (84.2, 110.1)                    | 93.4 (84.9, 103.5)                | 92.9 (83.2, 103.1)    | 88.8 (80.0, 97.0)      | 93.4 (86.2, 96.8)    | 99.9 (86.3, 111.2)    |
| FEV <sub>1</sub> /FVC%                    | 83.0 (80.2, 85.7)                     | 83.0 (80.8, 87.6)                 | 85.7 (81.0, 89.1)     | 83.8 (80.9, 84.8)      | 84.2 (82.8, 85.3)    | 86.3 (82.9, 88.9)     |
| FEF <sub>25-75%</sub>                     | 81.2 (71.9, 105.7)                    | 88.3 (69.8, 101.1)                | 91.2 (75.4, 110.0)    | 81.8 (71.9, 90.3)      | 97.8 (80.2, 112.0)   | 106.6 (83.4, 114.0)   |
| <b>Chest CT</b>                           |                                       |                                   |                       |                        |                      |                       |
| CT abnormal of GGO, n (%)                 | 64 (71.9) <sup>a,b</sup>              | 34 (38.2)                         | 25 (28.1)             | 5 (83.3)               | 4 (66.7)             | 3 (50.0)              |
| CT scores of GGO                          | 6.0 (3.0, 10.0) <sup>a,b</sup>        | 3.0 (1.0, 5.0) <sup>c</sup>       | 1.0 (0.0, 4.0)        | 10.5 (6.2, 14.8)       | 6.0 (3.8, 6.0)       | 3.5 (0.8, 5.5)        |
| CT abnormal of RP, n (%)                  | 57 (64.0) <sup>b</sup>                | 43 (48.3)                         | 30 (33.7)             | 4 (66.7)               | 4 (66.7)             | 4 (66.7)              |
| CT scores of RP                           | 7.0 (4.0, 15.0) <sup>a,b</sup>        | 4.0 (2.0, 8.0) <sup>c</sup>       | 2.0 (1.0, 7.0)        | 10.0 (5.2, 11.8)       | 8.5 (3.5, 9.0)       | 5.5 (2.8, 8.2)        |
| <b>6-minute walk test</b>                 |                                       |                                   |                       |                        |                      |                       |
| Distance, m                               | 511.0 (479.5, 554.0) <sup>a,b</sup>   | 562.2 (520.0, 605.4) <sup>c</sup> | 532.0 (507.5, 565.0)  | 570.0 (538.8, 617.0)   | 616.5 (603.9, 627.6) | 587.5 (543.8, 608.8)  |
| Predicted distance%                       | 92.0 (85.5, 99.0) <sup>a,b</sup>      | 100.0 (93.2, 106.0) <sup>c</sup>  | 96.0 (88.5, 103.0)    | 97.5 (89.0, 100.8)     | 102.0 (98.8, 106.0)  | 99.5 (92.2, 102.2)    |
| Borg dyspnea scale $\geq 1$ , n (%)       | 29 (52.7) <sup>a,b</sup>              | 14 (16.5) <sup>c</sup>            | 3 (3.8)               | 1 (25.0)               | 1 (16.7)             | 1 (16.7)              |
| hsTnT (ng/L)                              | 4.5 (3.0, 7.3)                        | 4.4 (3.0, 6.5)                    | 4.1 (3.0, 6.7)        | 5.5 (3.0, 8.4)         | 3.6 (3.0, 9.1)       | 3.0 (3.0, 3.8)        |
| hsTnT $\geq 14$ ng/L, n (%)               | 10 (7.3)                              | 5 (3.4)                           | 6 (3.9)               | 0 (0.0)                | 0 (0.0)              | 0 (0.0)               |
| NT <sub>50</sub> for serum SARS-CoV-2 NAb | 821.0 (394.0, 1817.0) <sup>a</sup>    | 294.0 (142.5, 595.0) <sup>c</sup> | 685.0 (321.0, 1282.5) | 641.0 (435.0, 1516.0)  | 281.0 (198.0, 518.0) | 420.0 (279.0, 1110.0) |
| Unvaccinated group                        | 1168.0 (522.5, 2215.5) <sup>a,b</sup> | 425.0 (155.0, 760.0)              | 283.0 (123.5, 513.5)  | 435.0 (367.5, 833.5)   | 265.0 (231.5, 273.0) | 279.0 (226.5, 292.0)  |
| Vaccinated group                          | 765.5 (341.0, 1491.8) <sup>a</sup>    | 283.0 (137.8, 583.0) <sup>c</sup> | 910.0 (501.0, 1466.5) | 1078.5 (506.8, 1710.2) | 488.5 (261.0, 966.5) | 869.0 (472.0, 1173.0) |
| <b>Mental health disorders</b>            |                                       |                                   |                       |                        |                      |                       |
| Depression, score                         | 5.0 (2.0, 9.0) <sup>b</sup>           | 4.0 (1.0, 8.0) <sup>c</sup>       | 1.0 (0.0, 4.0)        | 2.0 (1.0, 7.5)         | 3.0 (0.5, 5.5)       | 3.0 (0.0, 5.5)        |
| Depression score $\geq 5$                 | 50 (56.2) <sup>b</sup>                | 40 (44.9) <sup>c</sup>            | 20 (22.5)             | 3 (42.9)               | 3 (42.9)             | 3 (42.9)              |
| Anxiety disorder, score                   | 4.0 (0.0, 7.0) <sup>b</sup>           | 1.0 (0.0, 5.0)                    | 0.0 (0.0, 4.0)        | 3.0 (0.5, 4.0)         | 1.0 (0.0, 3.5)       | 0.0 (0.0, 3.5)        |
| Anxiety score $\geq 5$                    | 35 (38.9)                             | 27 (30.0)                         | 20 (22.2)             | 1 (14.3)               | 2 (28.6)             | 2 (28.6)              |

111 Data were expressed as median (interquartile range) or frequency (percentage). Kruskal-Wallis test was applied for group comparisons of  
112 continuous variables, and  $\chi^2$  test or Fisher Exact tests were performed to analyze the categorical variables. CT: computed tomography; FEV<sub>1</sub>:  
113 forced expiratory volume in one second; FVC: forced vital capacity; FEF<sub>25-75</sub>: forced expiratory flow between 25% and 75% of vital capacity;  
114 GGO, ground-glass opacity; RP, reticular pattern; hsTnT, highly-sensitive troponin T; NT<sub>50</sub>, the half-maximal inhibitory concentration; NAb,  
115 neutralizing antibody. <sup>a</sup> Significant difference between visit 1 and visit 2 groups ( $P < 0.05$ ). <sup>b</sup> Significant difference between visit 1 and visit 3  
116 groups ( $P < 0.05$ ). <sup>c</sup> Significant difference between visit 2 and visit 3 groups ( $P < 0.05$ ).



**eTable 8. Basic characteristics of participants who were included and excluded.**

| Variables                                                 | Included population<br>(N=208) | Excluded population<br>(N=81) | P value |
|-----------------------------------------------------------|--------------------------------|-------------------------------|---------|
| Age, years                                                | 58.0 (50.0, 64.3)              | 60.0 (52.0, 66.0)             | 0.236   |
| Gender, n (%)                                             |                                |                               | 0.698   |
| Male                                                      | 100 (48.1)                     | 41 (50.6)                     |         |
| Female                                                    | 108 (51.9)                     | 40 (49.4)                     |         |
| Education, n (%)                                          |                                |                               | 0.616   |
| Middle school or lower                                    | 140 (67.3)                     | 57 (70.4)                     |         |
| College or higher                                         | 68 (32.7)                      | 24 (29.6)                     |         |
| Household income, n (%)                                   |                                |                               | 0.209   |
| < 50000 RMB/year                                          | 107 (51.4)                     | 35 (43.2)                     |         |
| ≥ 50000 RMB/year                                          | 101 (48.6)                     | 46 (56.8)                     |         |
| Cigarette smoking, n (%)                                  |                                |                               | 0.607   |
| Never-smoker                                              | 183 (88.0)                     | 73 (90.1)                     |         |
| Ever-smoker                                               | 25 (12.0)                      | 8 (9.9)                       |         |
| Alcohol consumption, n (%)                                |                                |                               | 0.523   |
| Never-drinker                                             | 183 (88.0)                     | 69 (85.2)                     |         |
| Ever-drinker                                              | 25 (12.0)                      | 12 (14.8)                     |         |
| Comorbidity, n (%)                                        |                                |                               |         |
| Hypertension                                              | 75 (36.1)                      | 32 (39.5)                     | 0.586   |
| Diabetes                                                  | 23 (11.1)                      | 12 (14.8)                     | 0.379   |
| CVD                                                       | 14 (6.7)                       | 6 (7.4)                       | 0.839   |
| Body mass index                                           | 24.3 (22.6, 26.5)              | 24.0 (22.4, 25.9)             | 0.341   |
| Waist circumference                                       | 90 (83, 97)                    | 91.0 (83.0, 96.0)             | 0.924   |
| Duration from symptom onset to the last follow-up, months | 18.5 (18.2, 19.1)              | -                             | -       |

118 Continuous variables were expressed as median (interquartile range) and compared with the  
119 Mann-Whitney U test. Categorical variables were expressed as frequency (percentage) and  
120 compared with  $\chi^2$  test or Fisher's Exact test.

121

## 122 References

123 Diagnosis and treatment protocol for novel coronavirus pneumonia (trial version 7).  
124 2020;133(9):1087-95.
